# Supplementary material
Source: Royal Society of Chemistry journal article supplement (doi:10.1039/d6cp00690f)
Supplement: d6cp00690f1.pdf [file d6cp00690f1.pdf]

## “Supporting Information”

### **Mechanistic Insight into Sodium Intercalation Dynamics and Dual-Functional Electrocatalysis in 2D-FeS<sub>2</sub>**

Cheng-Dong Wei<sup>a</sup>, Xue-Jiao Wei<sup>b</sup>, Zhong-Lin Hu<sup>c</sup>, Xiong Li<sup>a</sup>, You-Jun Yu<sup>a</sup>, Chang-Sheng Chai<sup>a</sup>,

Fu-Ling Tang<sup>d\*</sup>

<sup>a</sup> *School of Bailie Mechanical Engineering, Lanzhou City University, Lanzhou 730070, China*

<sup>b</sup> *School of Humanities and Social Sciences, Xinjiang Institute of Technology, Xinjiang 843000, China*

<sup>c</sup> *Erzhong (Deyang) Heavy Equipment Co., Ltd. Deyang 618000, China*

<sup>d</sup> *School of Materials Science and Engineering, Lanzhou University of Technology, Lanzhou 730050, China*

\* Corresponding author.

E-mail address: tfl@lut.edu.cn (F. L. Tang)

## 1. Supplementary methods

### 1.1 Sulfur reduction reaction pathways

The detailed pathways are described in Eqs. (1)-(6).<sup>1,2</sup>

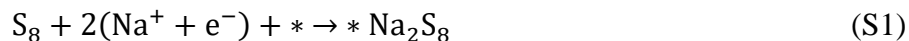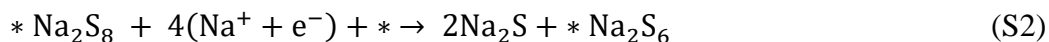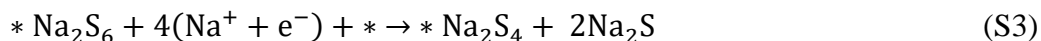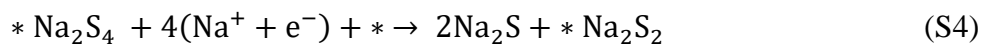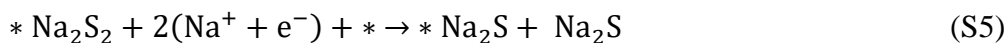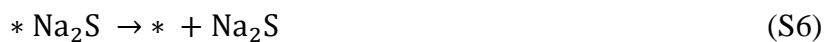

where \* is for 2D- $\text{Na}_x\text{FeS}_2$  ( $x = 0, 1.5$  and  $2$ ).  $* \text{Na}_2\text{S}_8$ ,  $* \text{Na}_2\text{S}_6$ ,  $* \text{Na}_2\text{S}_4$ ,  $* \text{Na}_2\text{S}_2$  and  $* \text{Na}_2\text{S}$  indicate that  $\text{Na}_2\text{S}_8$ ,  $\text{Na}_2\text{S}_6$ ,  $\text{Na}_2\text{S}_4$ ,  $\text{Na}_2\text{S}_2$  and  $\text{Na}_2\text{S}$  are adsorbed on 2D- $\text{Na}_x\text{FeS}_2$  surface, respectively.

### 1.2 Calculation details for Gibbs free energy

The \* is for the active site of 2D- $\text{Na}_x\text{FeS}_2$  ( $x = 0, 1.5$  and  $2$ ). The  $*\text{Na}_2\text{S}_n$  ( $0 \leq n \leq 8$ ) represented the intermediate species adsorbed on the active sites. Gibbs free energy is obtained from the following formula.  $\Delta G$  is for each reaction step.

$$\Delta G = \Delta E_{\text{DFT}} + \Delta \text{ZPE} - T\Delta S \quad (\text{S7})$$

$\Delta E_{\text{DFT}}$  is the total energy calculated by DFT,  $\Delta \text{ZPE}$  represents zero energy,  $T\Delta S$  represents entropy contribution.  $\Delta \text{ZPE}$  and  $T\Delta S$  are obtained by calculating the rotational frequency of the adsorbed molecules (NaPSs), and the temperature is set as 298.15 K. In Gibbs free energy calculation, SCF convergence and max force are set to 450 eV and  $1.0 \times 10^{-7}$  eV. Gamma point of Brillouin  $3 \times 3 \times 1$  was applied to calculate the frequency.

## 2. Supplementary figures

**Figure S1.** Adsorption structures for  $\text{Na}^+$  on the top (a), hollow (b) and Fe (c) sites of 2D- $\text{FeS}_2$  surface

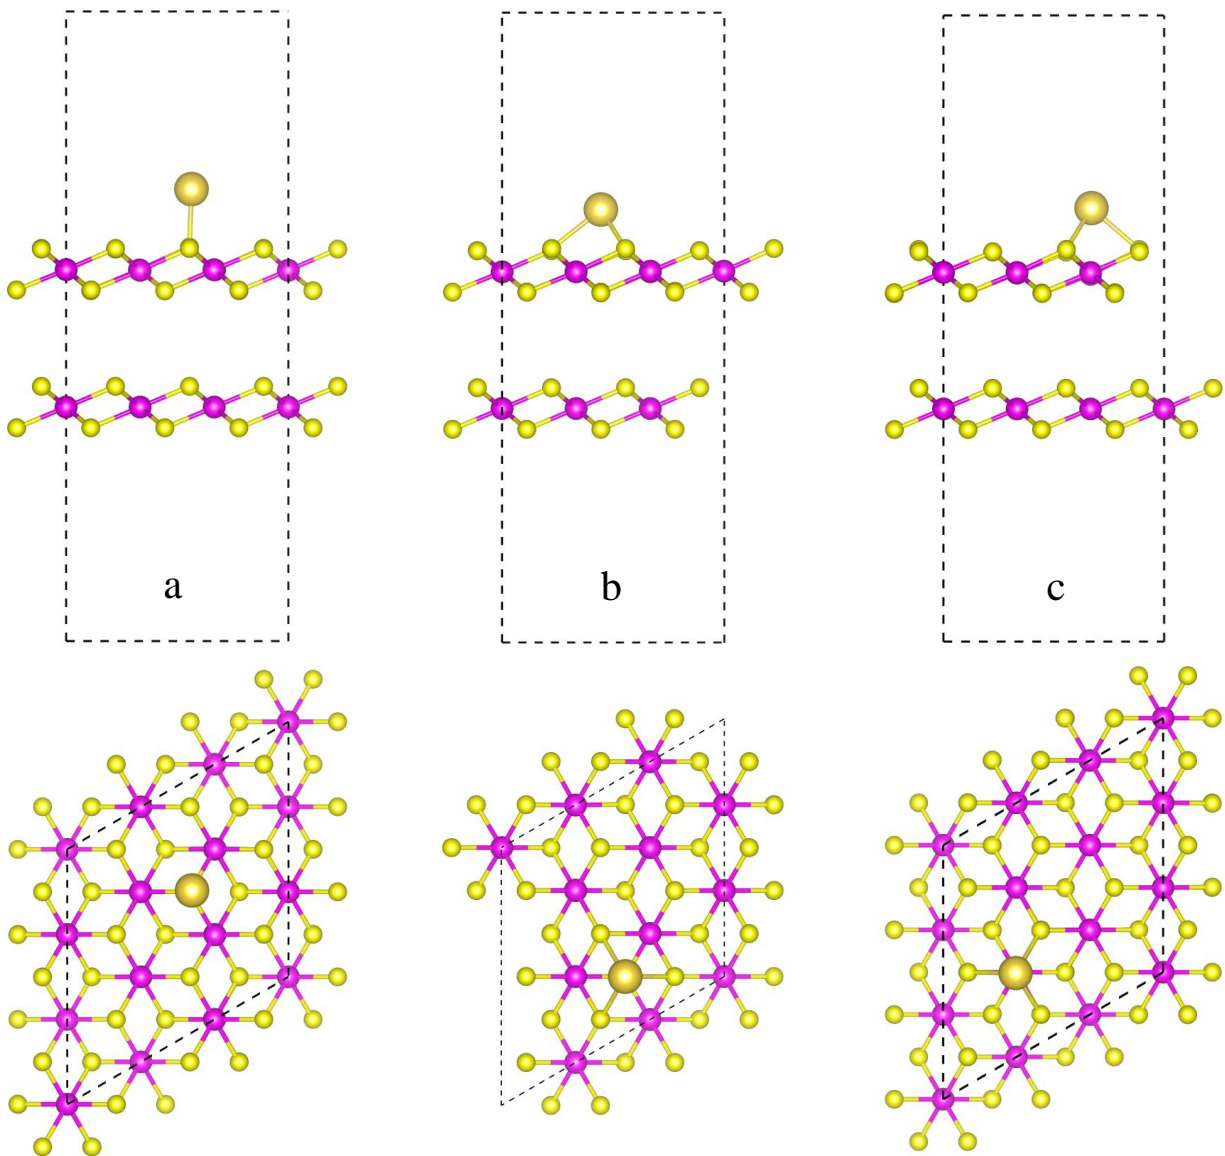

**Figure S2.** Structures for 2D- $\text{Na}_{0.17}\text{FeS}_2$ -1 (a), 2D- $\text{Na}_{0.17}\text{FeS}_2$ -2 (b) and 2D- $\text{Na}_{0.17}\text{FeS}_2$ -3 (c)

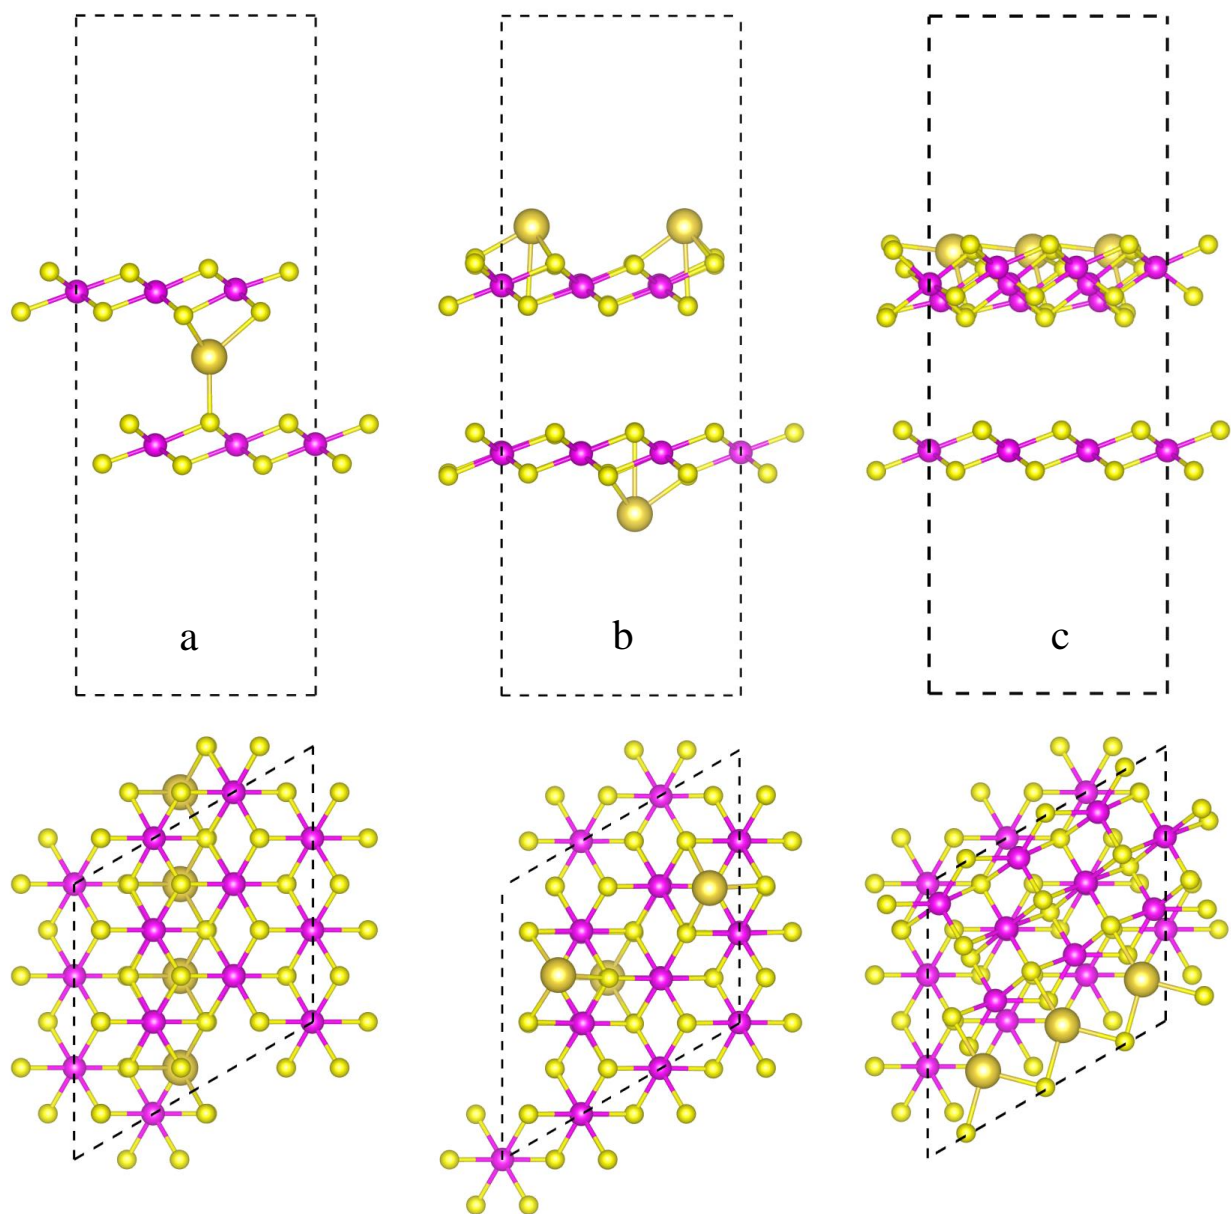

**Figure S3.** Structures for 2D- $\text{Na}_{0.33}\text{FeS}_2$ -1 (a), 2D- $\text{Na}_{0.33}\text{FeS}_2$ -2 (b) and 2D- $\text{Na}_{0.33}\text{FeS}_2$ -3 (c)

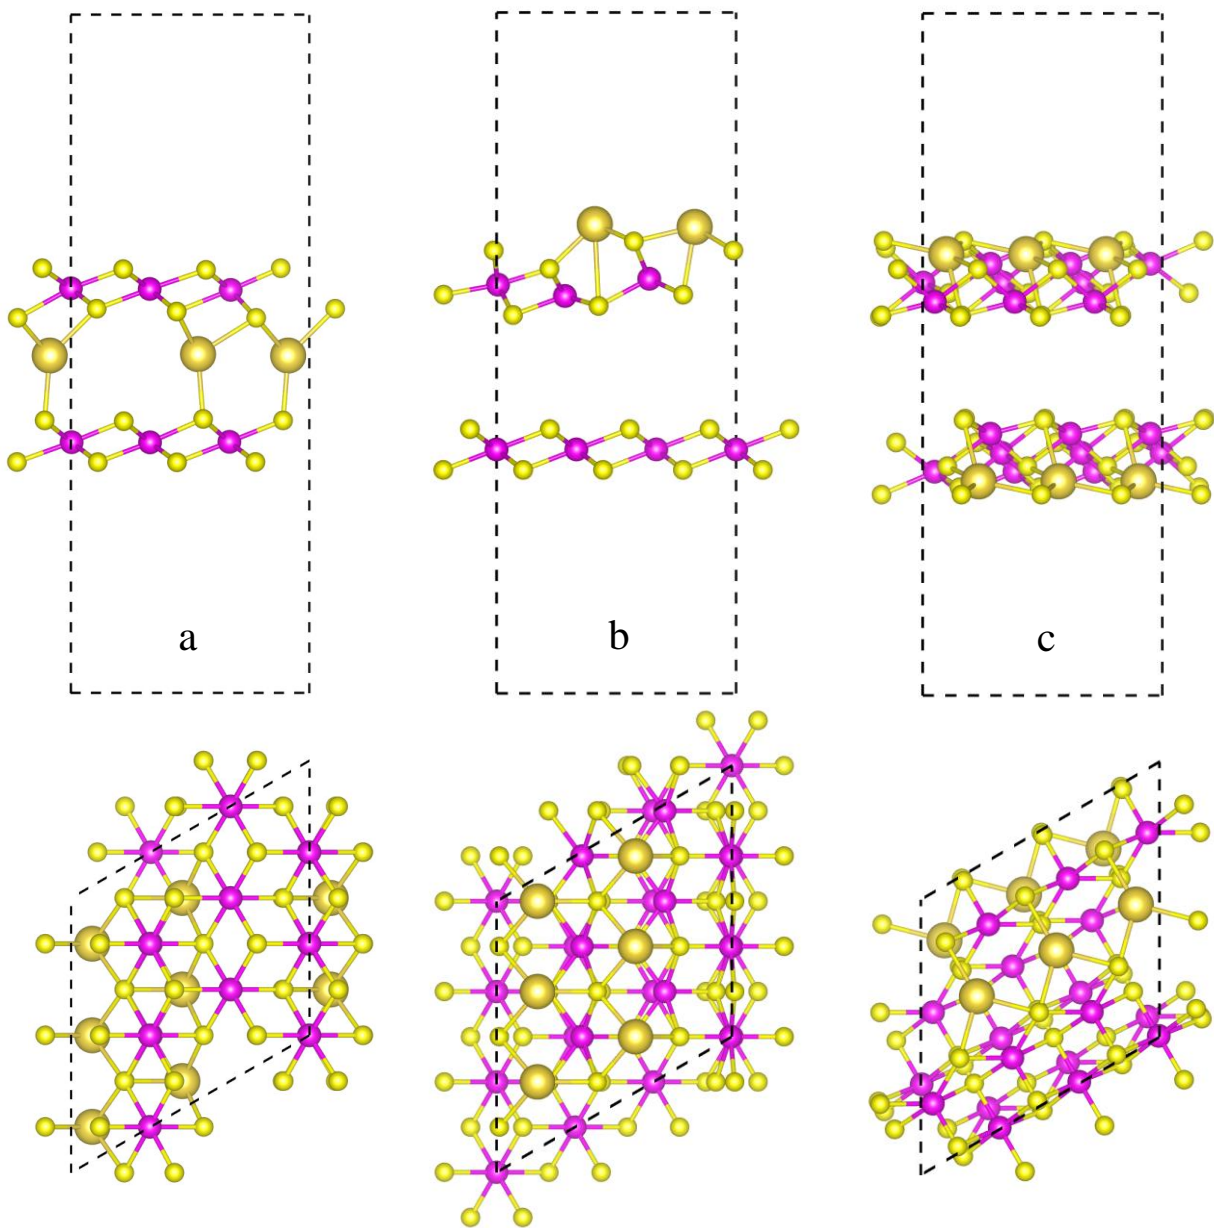

**Figure S4.** Structures for 2D- $\text{Na}_{0.5}\text{FeS}_2$ -1 (a) and 2D- $\text{Na}_{0.5}\text{FeS}_2$ -2 (b)

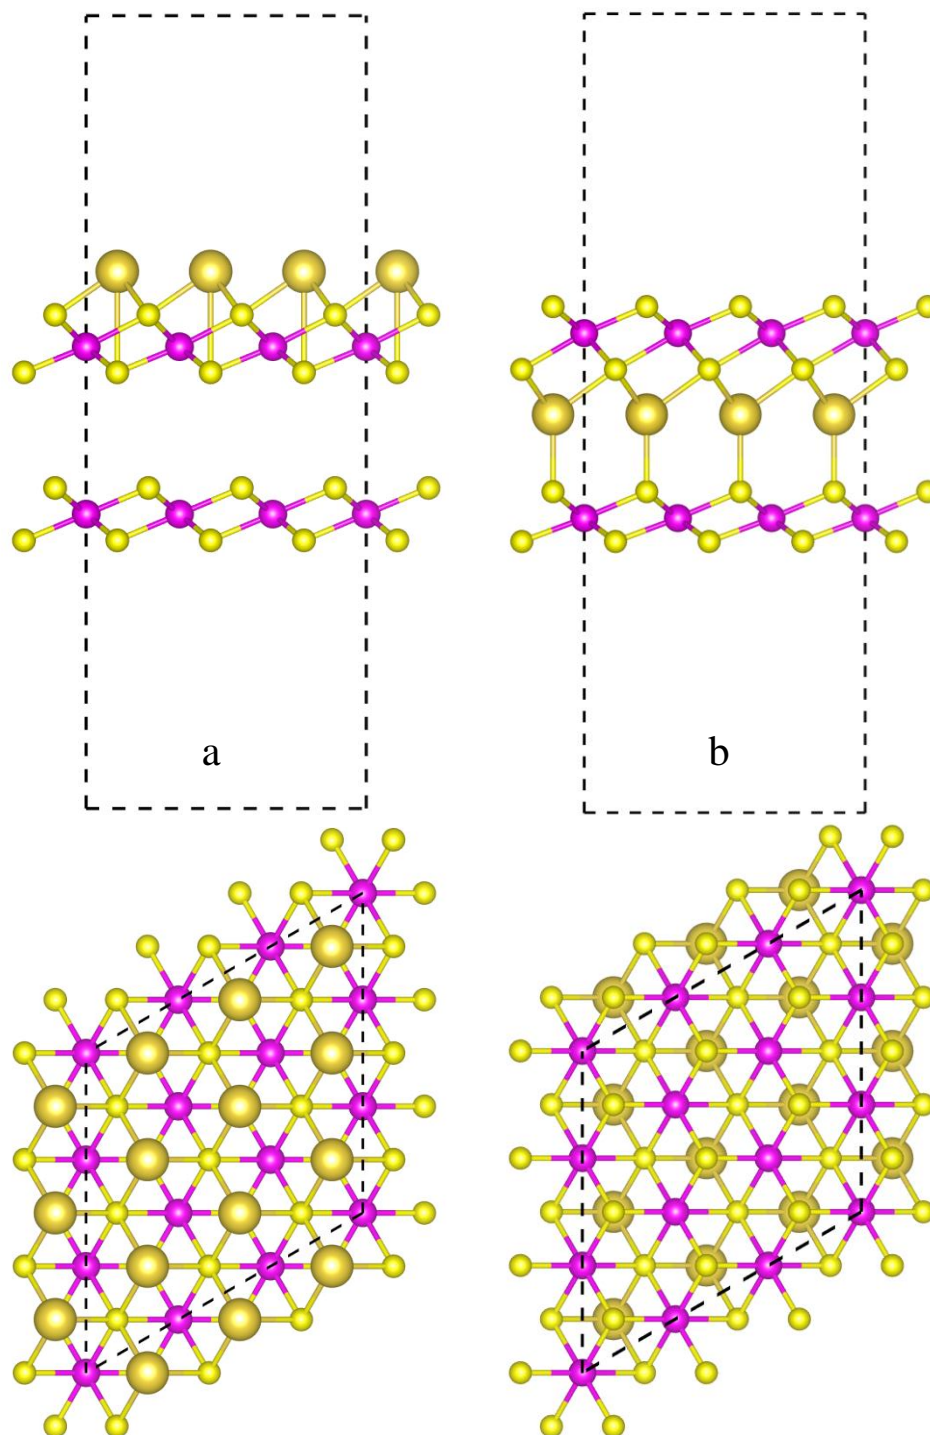

**Figure S5.** Structures for 2D- $\text{Na}_{0.67}\text{FeS}_2$ -1 (a), 2D- $\text{Na}_{0.67}\text{FeS}_2$ -2 (b) and 2D- $\text{Na}_{0.67}\text{FeS}_2$ -3 (c)

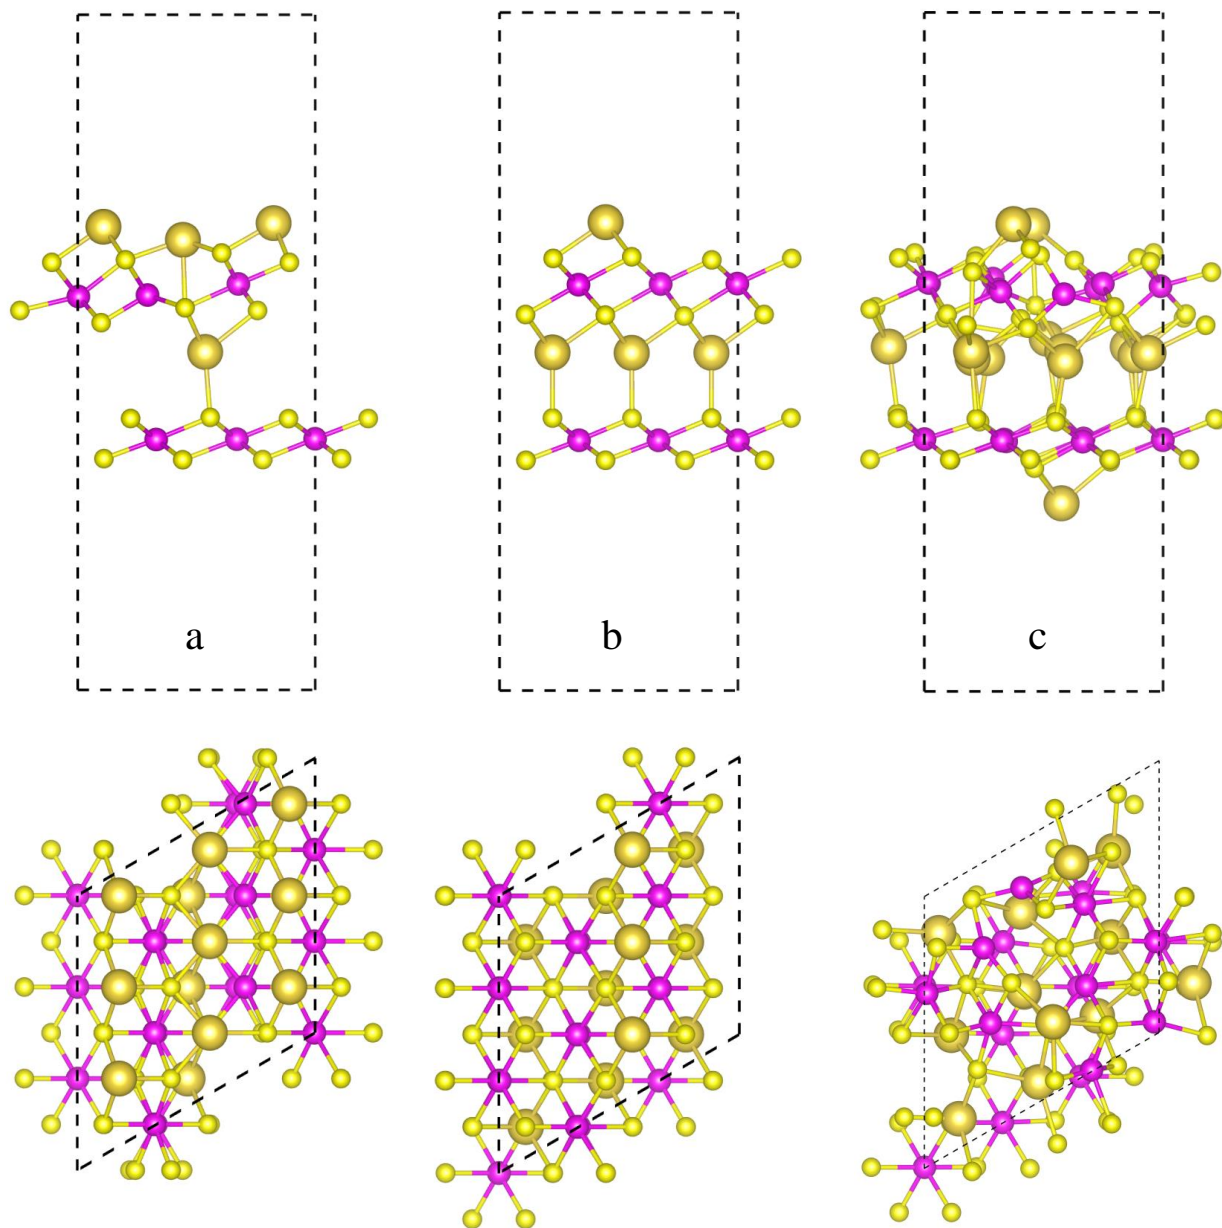

**Figure S6.** Structures for 2D- $\text{Na}_{0.83}\text{FeS}_2$ -1 (a), 2D- $\text{Na}_{0.83}\text{FeS}_2$ -2 (b) and 2D- $\text{Na}_{0.83}\text{FeS}_2$ -3 (c)

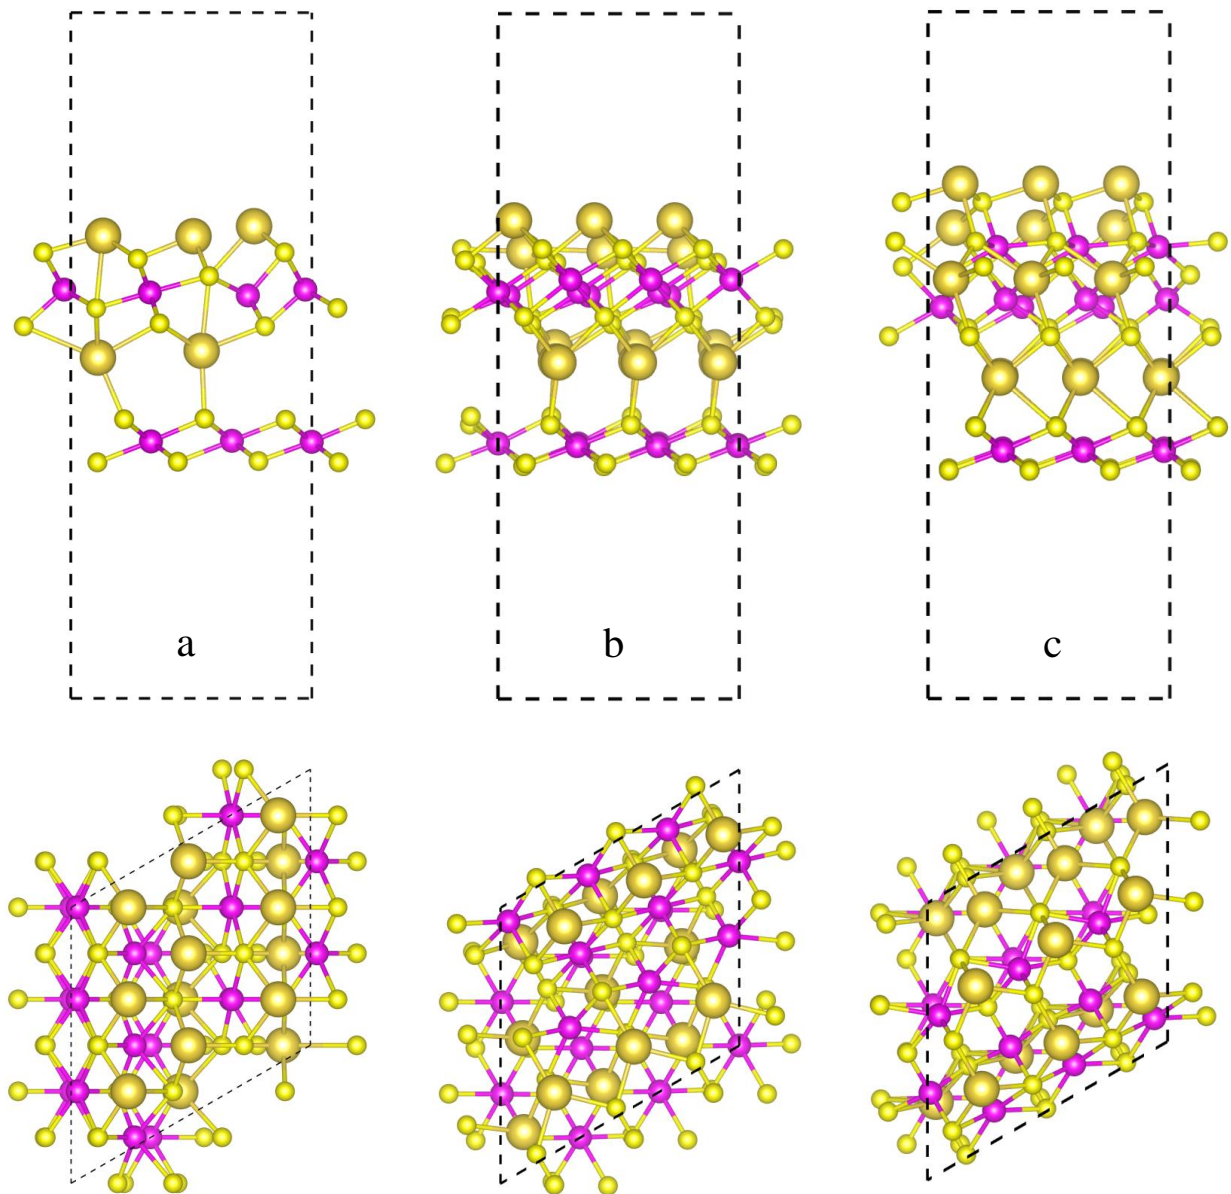

**Figure S7.** Structures for 2D-NaFeS<sub>2</sub>-1 (a), 2D-NaFeS<sub>2</sub>-2 (b), 2D-NaFeS<sub>2</sub>-3 (c) and 2D-NaFeS<sub>2</sub>-4 (d)

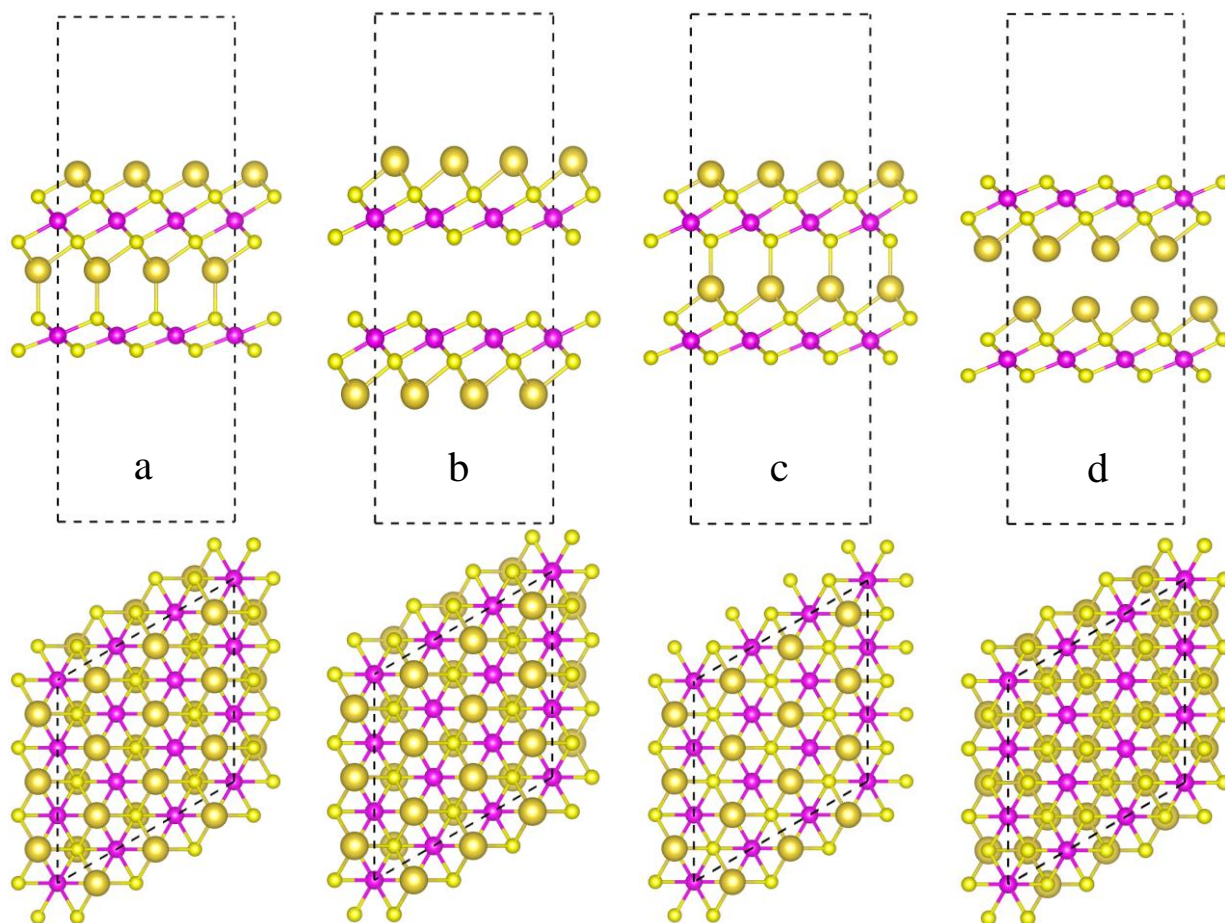

**Figure S8.** Structures for 2D-Na<sub>1.17</sub>FeS<sub>2</sub>-1 (a), 2D-Na<sub>1.17</sub>FeS<sub>2</sub>-2 (b) and 2D-Na<sub>1.17</sub>FeS<sub>2</sub>-3 (c)

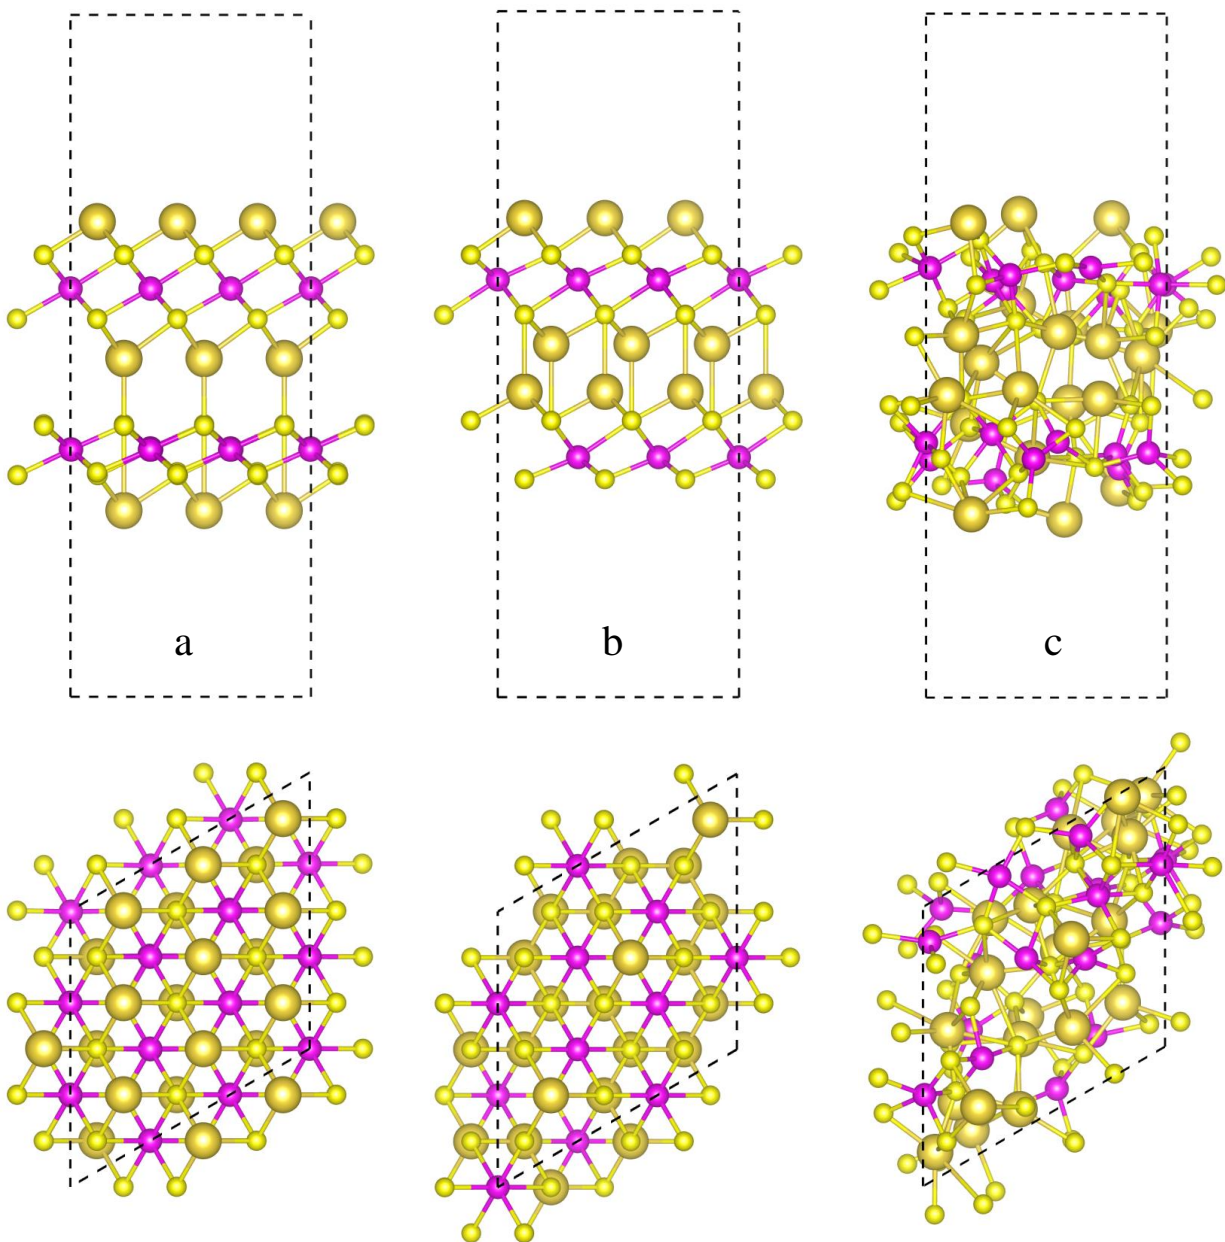

**Figure S9.** Structures for 2D- $\text{Na}_{1.33}\text{FeS}_2$ -1 (a), 2D- $\text{Na}_{1.33}\text{FeS}_2$ -2 (b), 2D- $\text{Na}_{1.33}\text{FeS}_2$ -3 (c) and 2D- $\text{Na}_{1.33}\text{FeS}_2$ -4 (d)

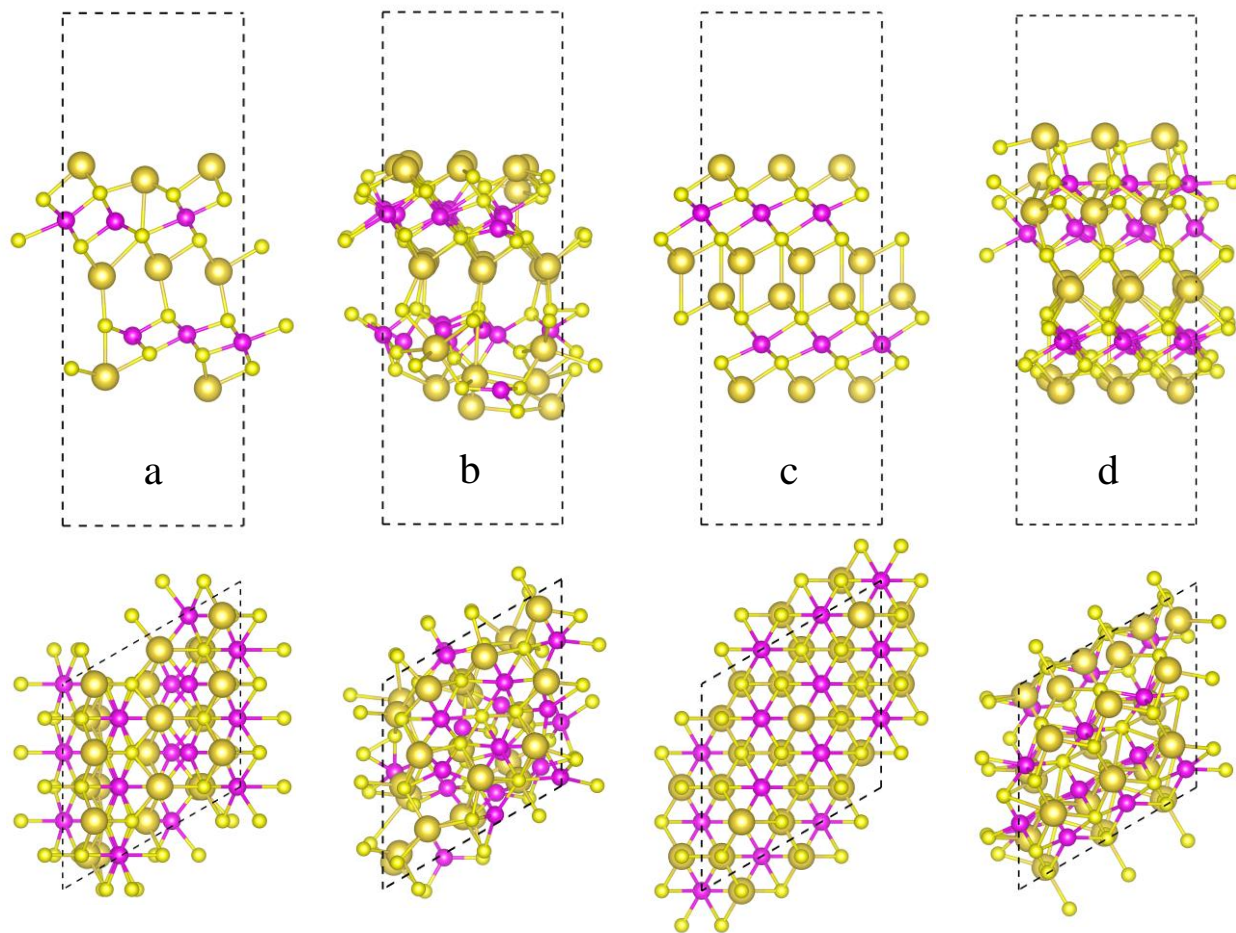

**Figure S10.** Structures for 2D- $\text{Na}_{1.5}\text{FeS}_2$ -1 (a), 2D- $\text{Na}_{1.5}\text{FeS}_2$ -2 (b) and 2D- $\text{Na}_{1.5}\text{FeS}_2$ -3 (c)

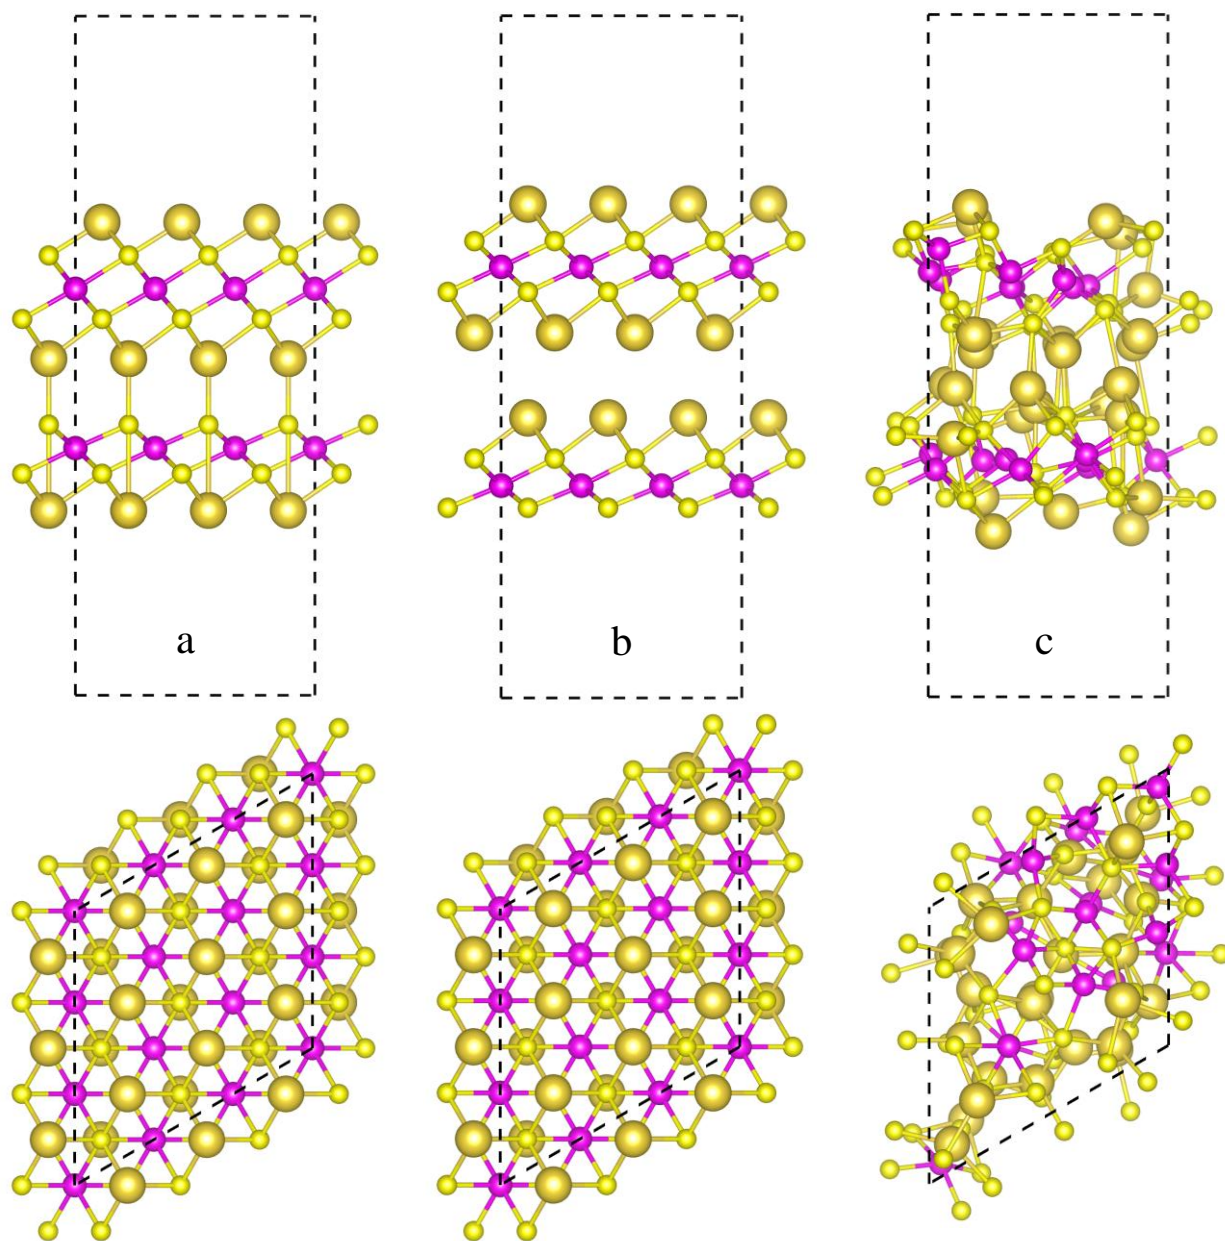

**Figure S11.** Structures for 2D- $\text{Na}_{1.67}\text{FeS}_2$ -1 (a) and 2D- $\text{Na}_{1.67}\text{FeS}_2$ -2 (b)

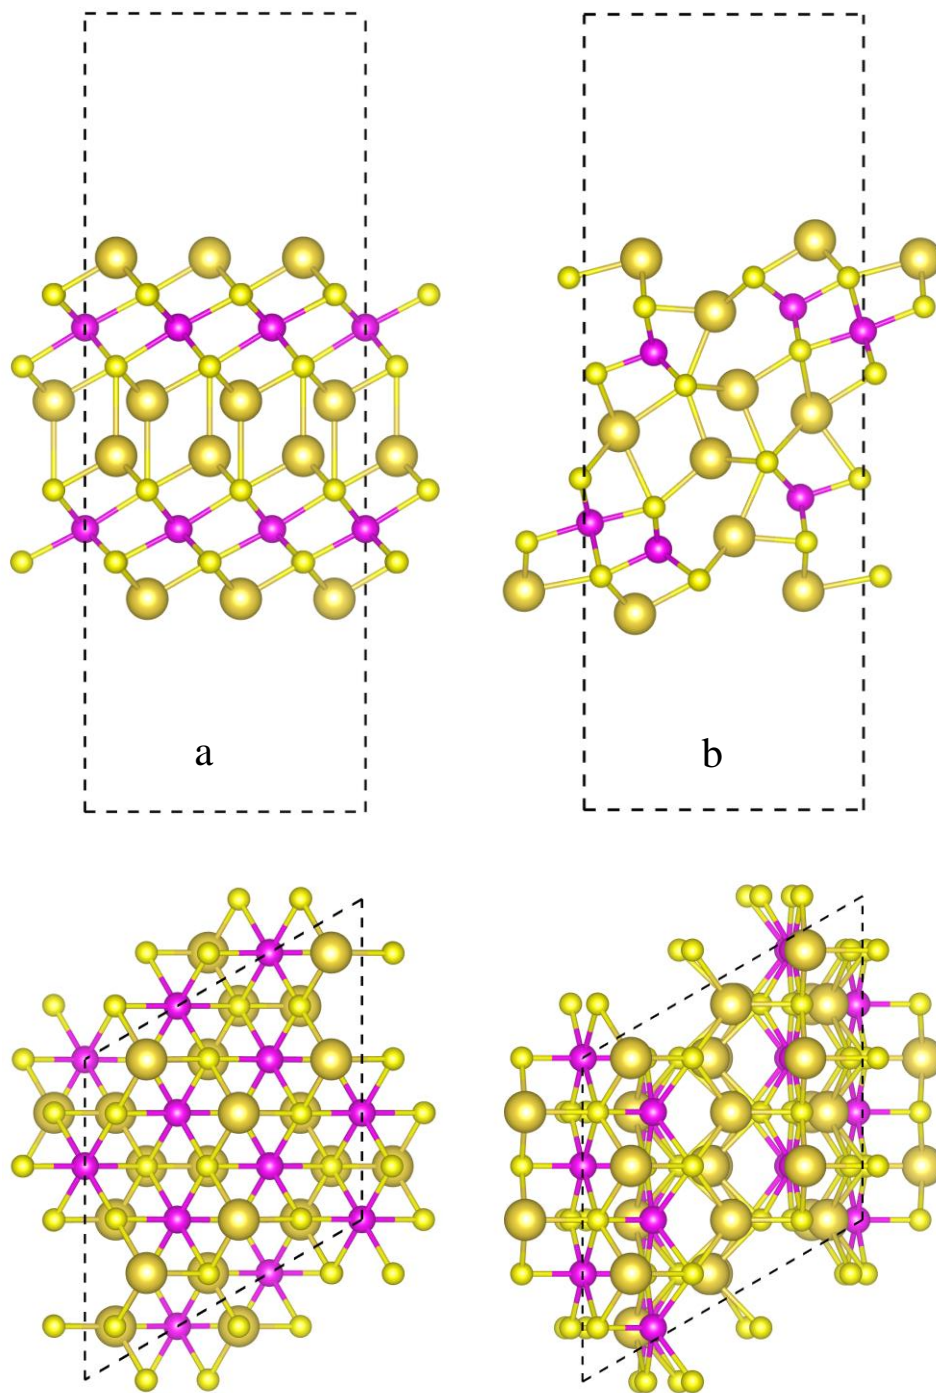

**Figure S12.** Structures for 2D- $\text{Na}_{1.83}\text{FeS}_2$ -1 (a) and 2D- $\text{Na}_{1.83}\text{FeS}_2$ -2 (b)

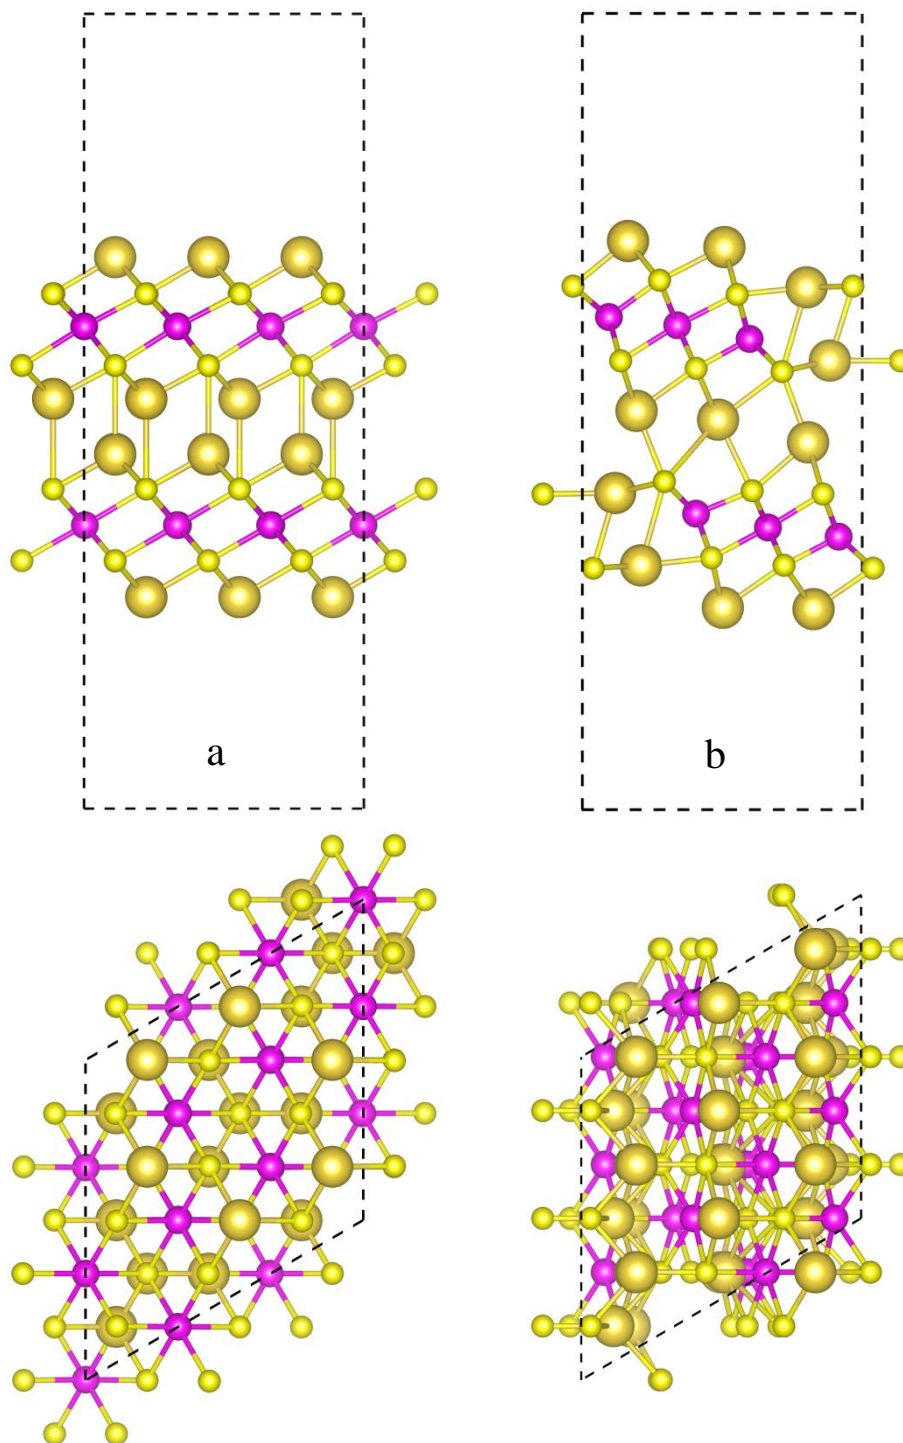

**Figure S13.** Structure of 2D- $\text{Na}_2\text{FeS}_2$

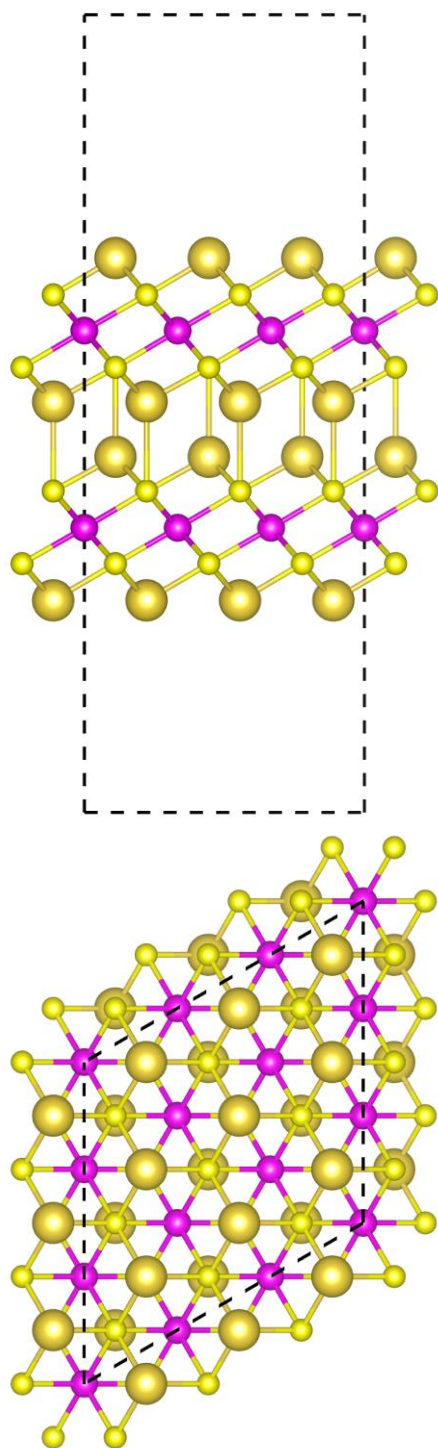

**Figure S14.** Na<sup>+</sup> diffusion path on 2D-FeS<sub>2</sub> (a), 2D-Na<sub>0.17</sub>FeS<sub>2</sub> (b), 2D-Na<sub>0.33</sub>FeS<sub>2</sub> (c), 2D-Na<sub>0.67</sub>FeS<sub>2</sub> (d), 2D-Na<sub>1.17</sub>FeS<sub>2</sub> (e), 2D-Na<sub>1.5</sub>FeS<sub>2</sub> (f) and 2D-Na<sub>2</sub>FeS<sub>2</sub> (g) surfaces.

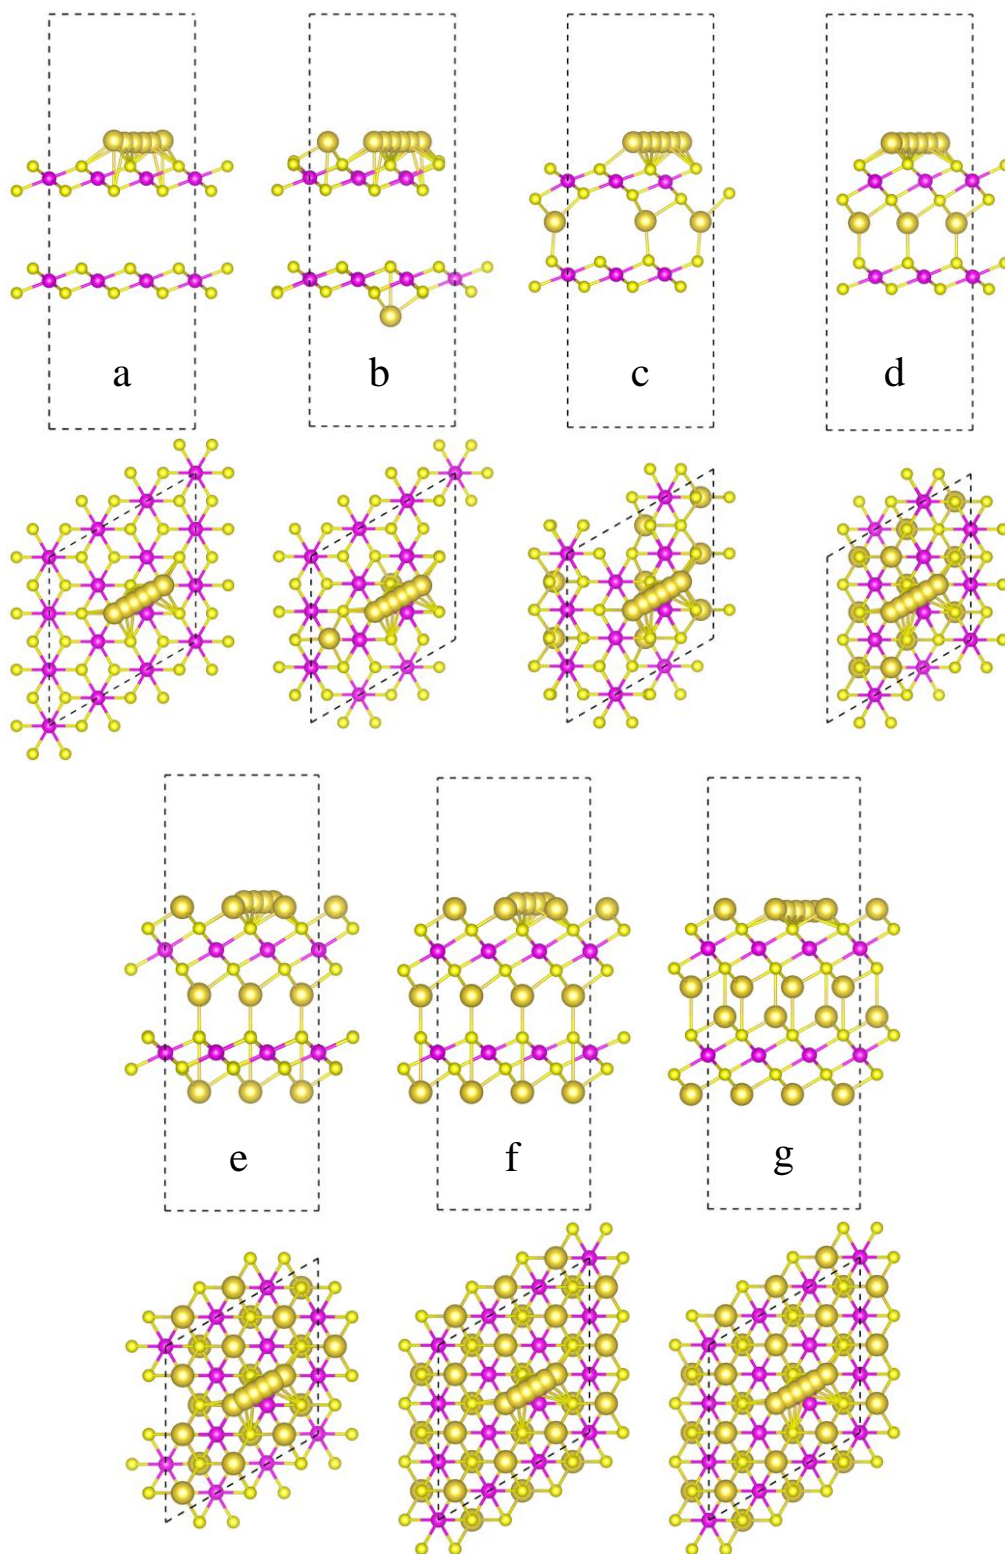

**Figure S15.** Adsorption structures of  $S_8$  (a),  $Na_2S_8$  (b),  $Na_2S_6$  (c),  $Na_2S_4$  (d),  $Na_2S_2$  (e) and  $Na_2S$  (f) on 2D- $FeS_2$  surface

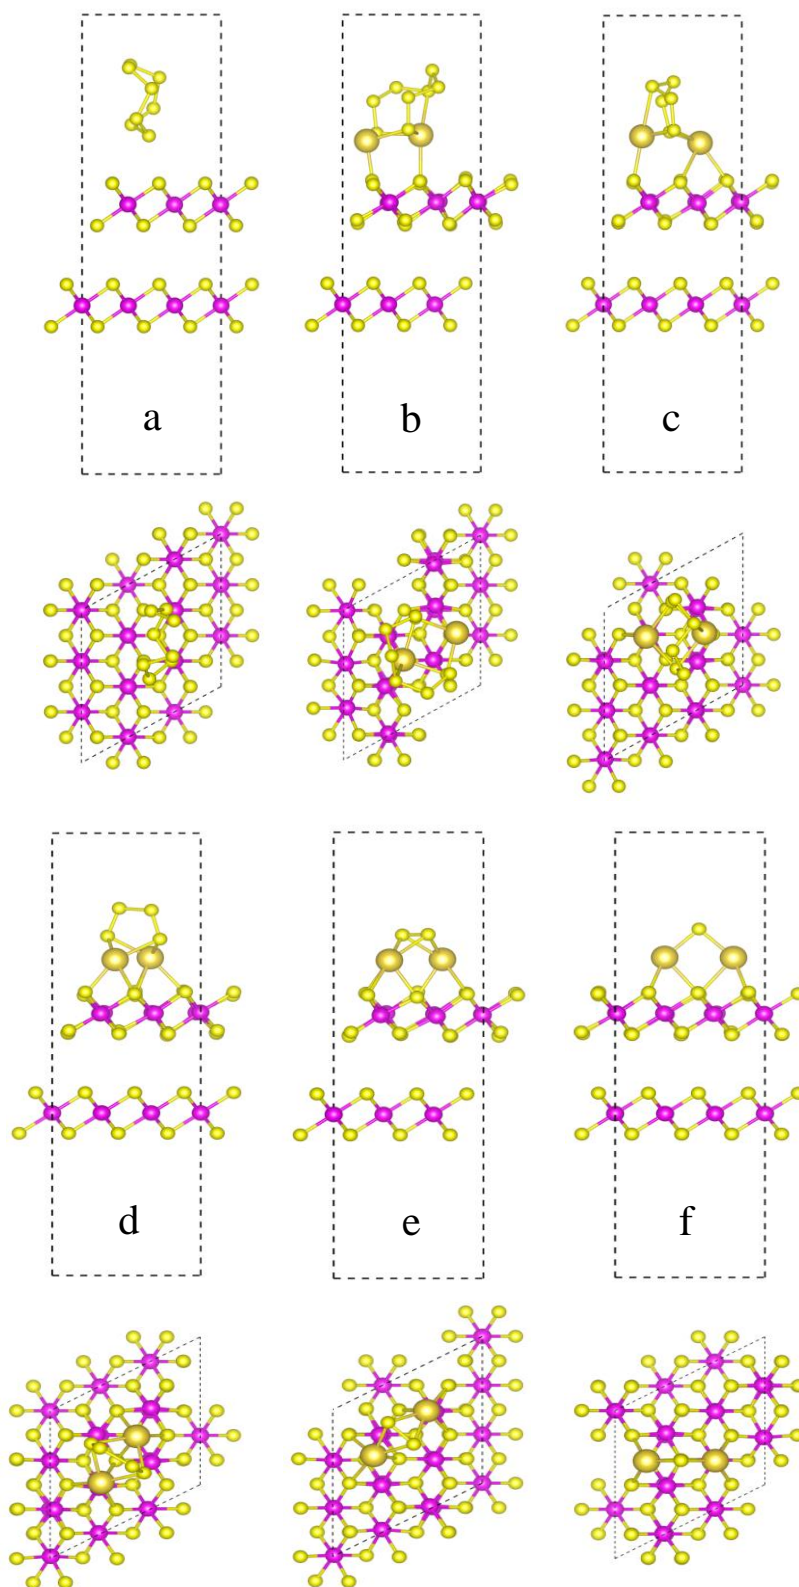

**Figure S16.** Adsorption structures of  $S_8$  (a),  $Na_2S_8$  (b),  $Na_2S_6$  (c),  $Na_2S_4$  (d),  $Na_2S_2$  (e), and  $Na_2S$  (f) on 2D- $Na_{1.5}FeS_2$  surface

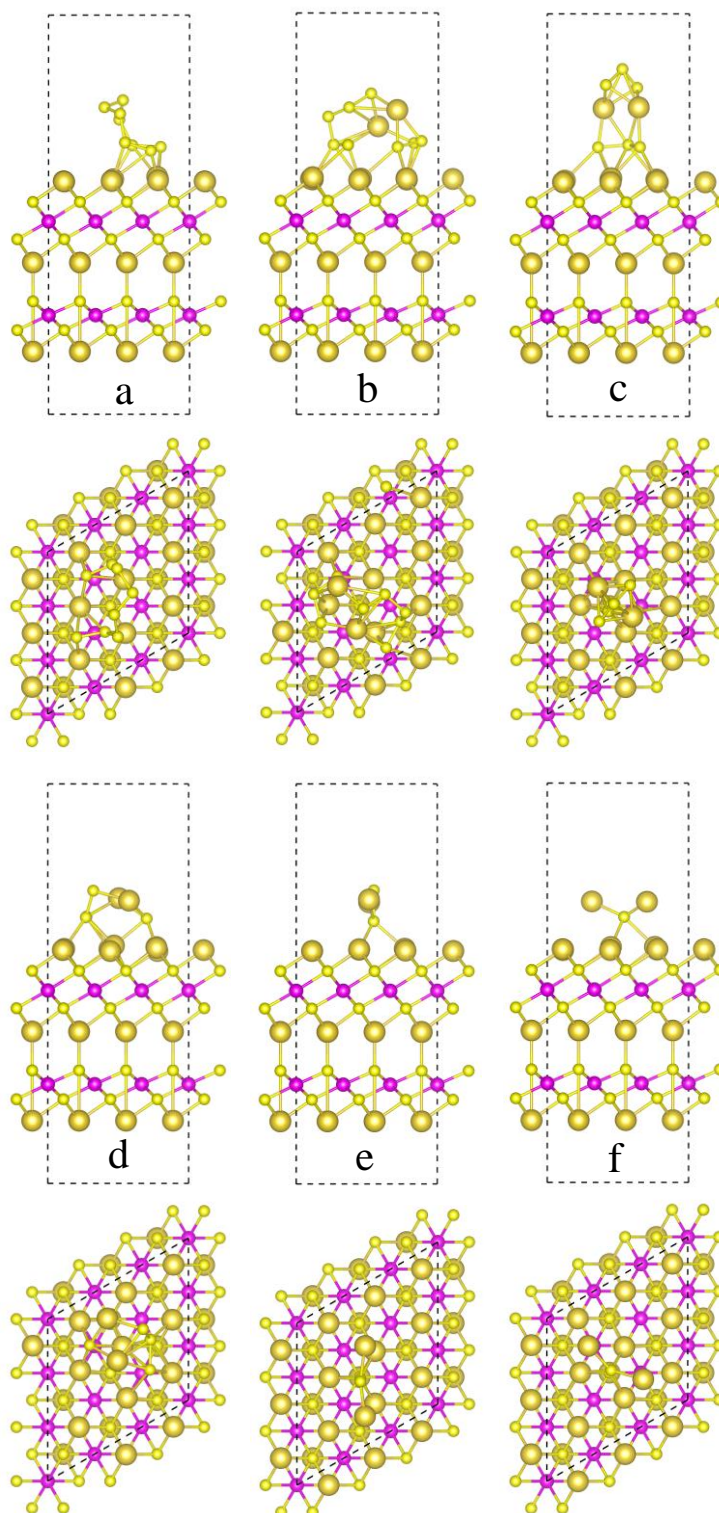

**Figure S17.** Adsorption structures of  $S_8$  (a),  $Na_2S_8$  (b),  $Na_2S_6$  (c),  $Na_2S_4$  (d),  $Na_2S_2$  (e), and  $Na_2S$  (f) on 2D- $Na_2FeS_2$  surface

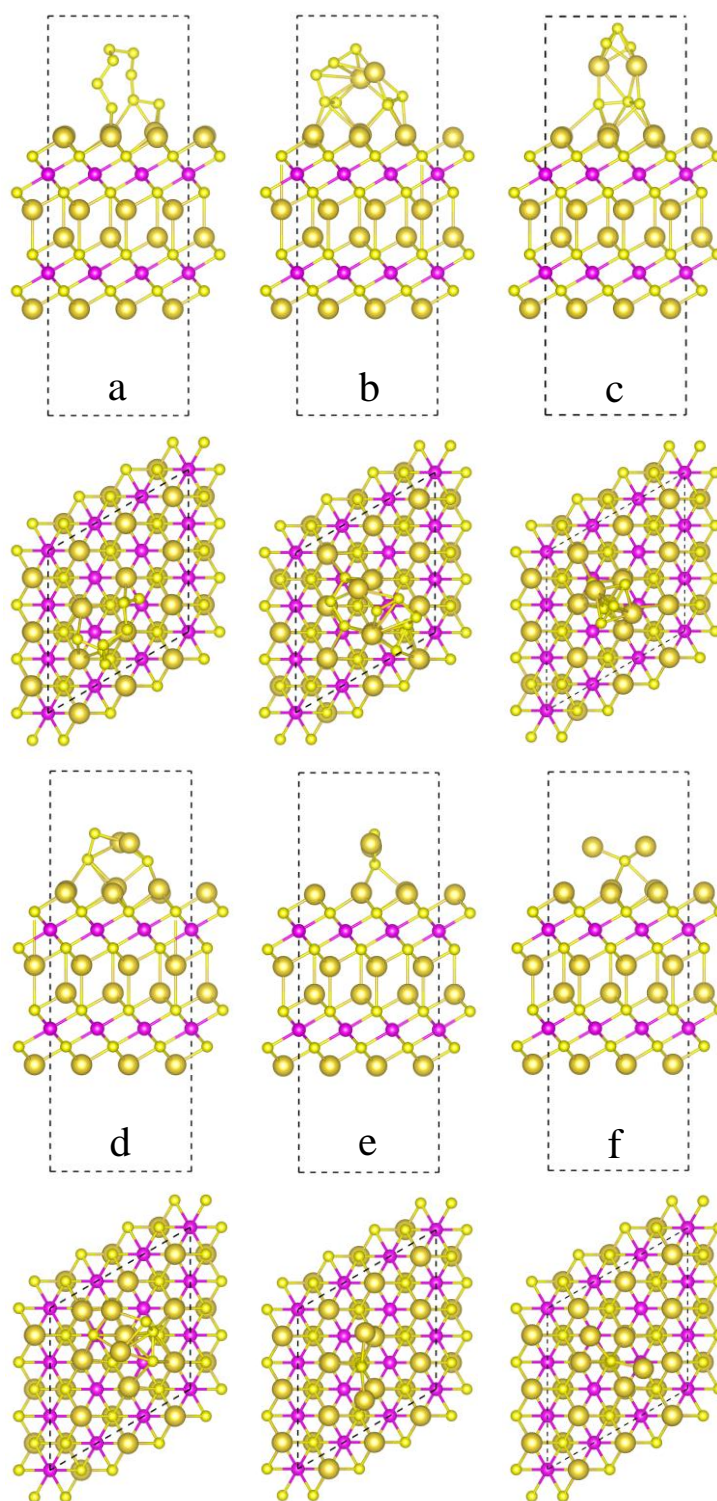

**Figure S18.** Decomposition paths for  $\text{Na}_2\text{S}$  on  $2\text{D-FeS}_2$  (a),  $2\text{D-Na}_{1.5}\text{FeS}_2$  (b) and  $2\text{D-Na}_2\text{FeS}_2$  (c) surfaces

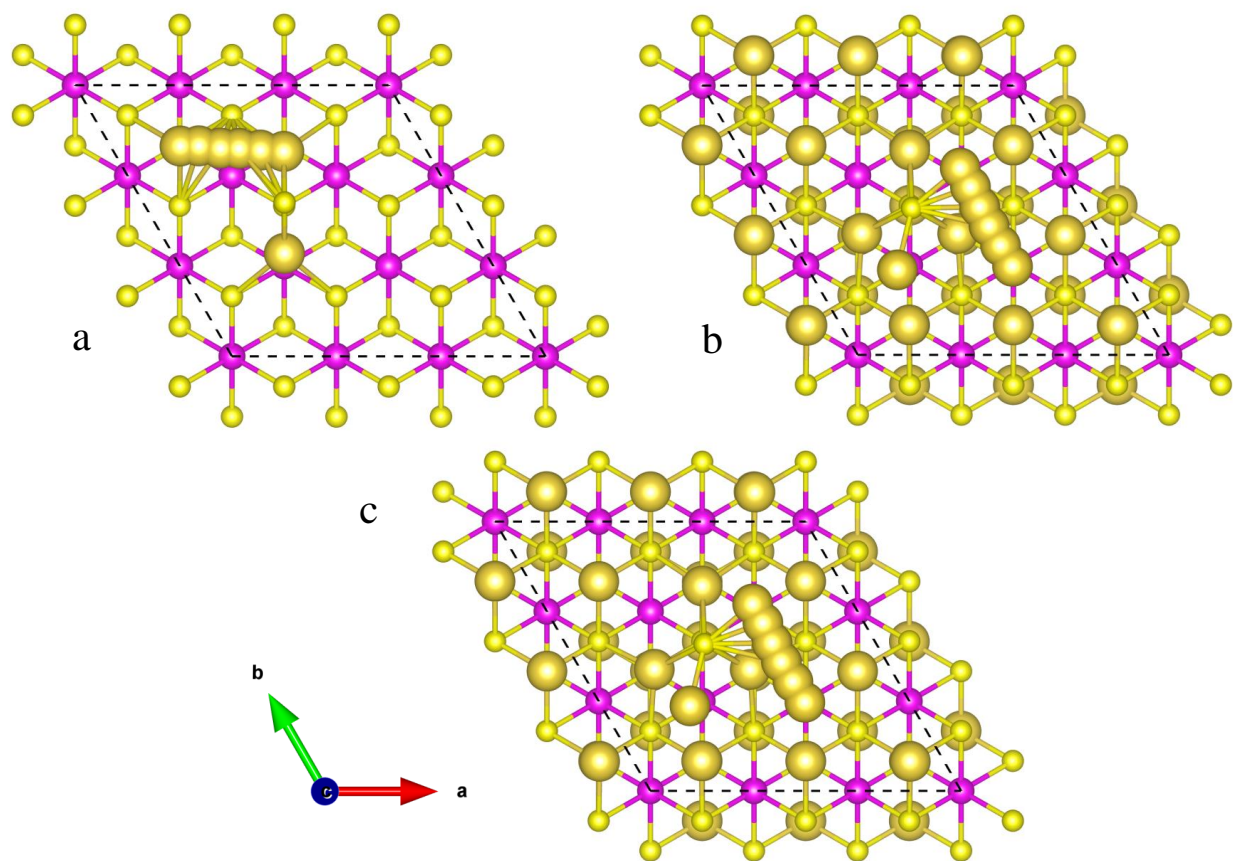

## References

1. L. Zhao, Y. Tao, Y. Zhang, Y. Lei, W. H. Lai, S. Chou, H. K. Liu, S. X. Dou and Y. X. Wang, *Adv. Mater.*, 2024, **36**, 2402337.
2. Y. J. Lei, H. W. Liu, Z. Yang, L. F. Zhao, W. H. Lai, M. Chen, H. Liu, S. Dou and Y. X. Wang, *Adv. Funct. Mater.*, 2023, **33**, 2212600.
